# Supplementary material
Source: PubMed Central journal article supplement (PMC3059577)
Supplement: mmc1.pdf [file mmc1.pdf]

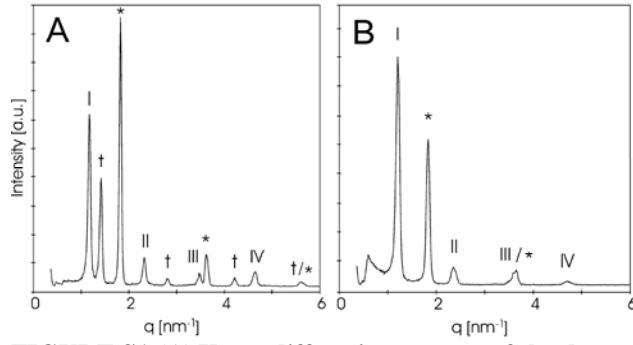

**FIGURE S1** (A) X-ray diffraction pattern of the deuterated sample after equilibration at 70°C (B) X-ray diffraction pattern of the deuterated sample after re-equilibration at 90°C. The reflections of the SPP are indicated by Roman numbers I to IV. Reflections of an additional 4.4 nm phase are indicated by a cross and reflections from crystalline CHOL are indicated by asterisks.
